# Supplementary material for: Green synthesis of chlorella-derived carbon dots and their fluorescence imaging in zebrafish
Source: Royal Society of Chemistry journal article supplement (doi:10.1039/d3ra07623g), 2024-01-01
Supplement: d3ra07623g1.pdf [file d3ra07623g1.pdf]

This version of the ESI published 25 Mar 2024 replaces the original version published 05 Jan 2024. Figure S2 has been updated due to incorrect images in the original version.

## Electronic Supplementary Information

Green synthesis of chlorella-derived carbon dots and their fluorescence imaging in zebrafish

Yue Wang,<sup>a</sup> Zhihi Gu,<sup>\*a</sup> Jingyi Dong,<sup>a</sup> Guohan Li,<sup>a</sup> Meichen Lu,<sup>a</sup> Jie Zhu,<sup>a</sup> Cunguang Liu,<sup>a</sup> Jian Han,<sup>a</sup> Shengnan Cao,<sup>a</sup> Liyong Chen<sup>b</sup> and Wei Wang<sup>\*a</sup>

<sup>a</sup>Key Laboratory of Applied Biology and Aquaculture of Northern Fishes in Liaoning Province, Dalian Ocean University, Dalian, Dalian 116023, China. E-mail: guzhizhi@dlou.edu.cn

<sup>b</sup>State Key Laboratory of Fine Chemicals Dalian University of Technology 2 Linggong RD., Dalian, 116024, China.

## **Experimental Section**

### ***Materials and Chemicals***

All chemical reagents were used as received. Chlorella were purchased from Xinyuan Fine Chemical Co., LTD., China. Zebrafish were purchased from Shanghai Feixi Co., LTD..

### ***Characterization Methods***

X-ray diffraction (XRD) was conducted with a Rigaku D/Max 2400 automatic powder X-ray diffractometer with Cu-K $\alpha$  radiation ( $\lambda = 1.5418 \text{ \AA}$ ). UV-Vis absorption spectroscopy was performed on U-4100 spectrophotometer. Surface elemental composition and chemical state of samples were analyzed by X-ray photoelectron spectroscopy (XPS) on Thermo ESCALAB 250Xi with Al- K  $\alpha$  radiation ( $h\nu = 1486.6 \text{ eV}$ ). Fourier transform infrared (FTIR) spectroscopy was carried out on a Nicolet 6700 spectrometer.

### ***Synthesis of CDs***

Chlorella (10 g) and distilled water (50 mL) were added into the beaker sequentially, and transferred the solution to a reactor after stirring for 10 min. The reactor was heated at 200 °C for 8 h. Afterward, the final mixture was cooled down to room temperature and collected by suction filtrating using a pinhole filter (0.22  $\mu\text{m}$ ) before freeze drying of the resulting brown powder sample.

### ***Breeding conditions of zebrafish***

The male/female zebrafish were separated. Water was changed daily, and zebrafish were fed three times a day. The light period of 12 h was temporarily extended for 7

days. The male and female fish were placed in the middle of the spawning box at opposite ends of the board. At 8 am the next day, the cover was removed, and two hours later, the eggs were collected.

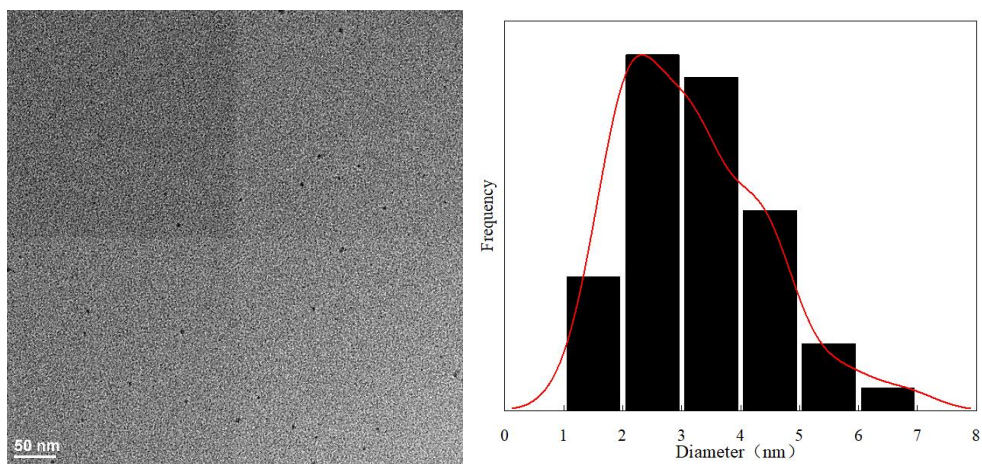

**Figure S1.** TEM image of CDs

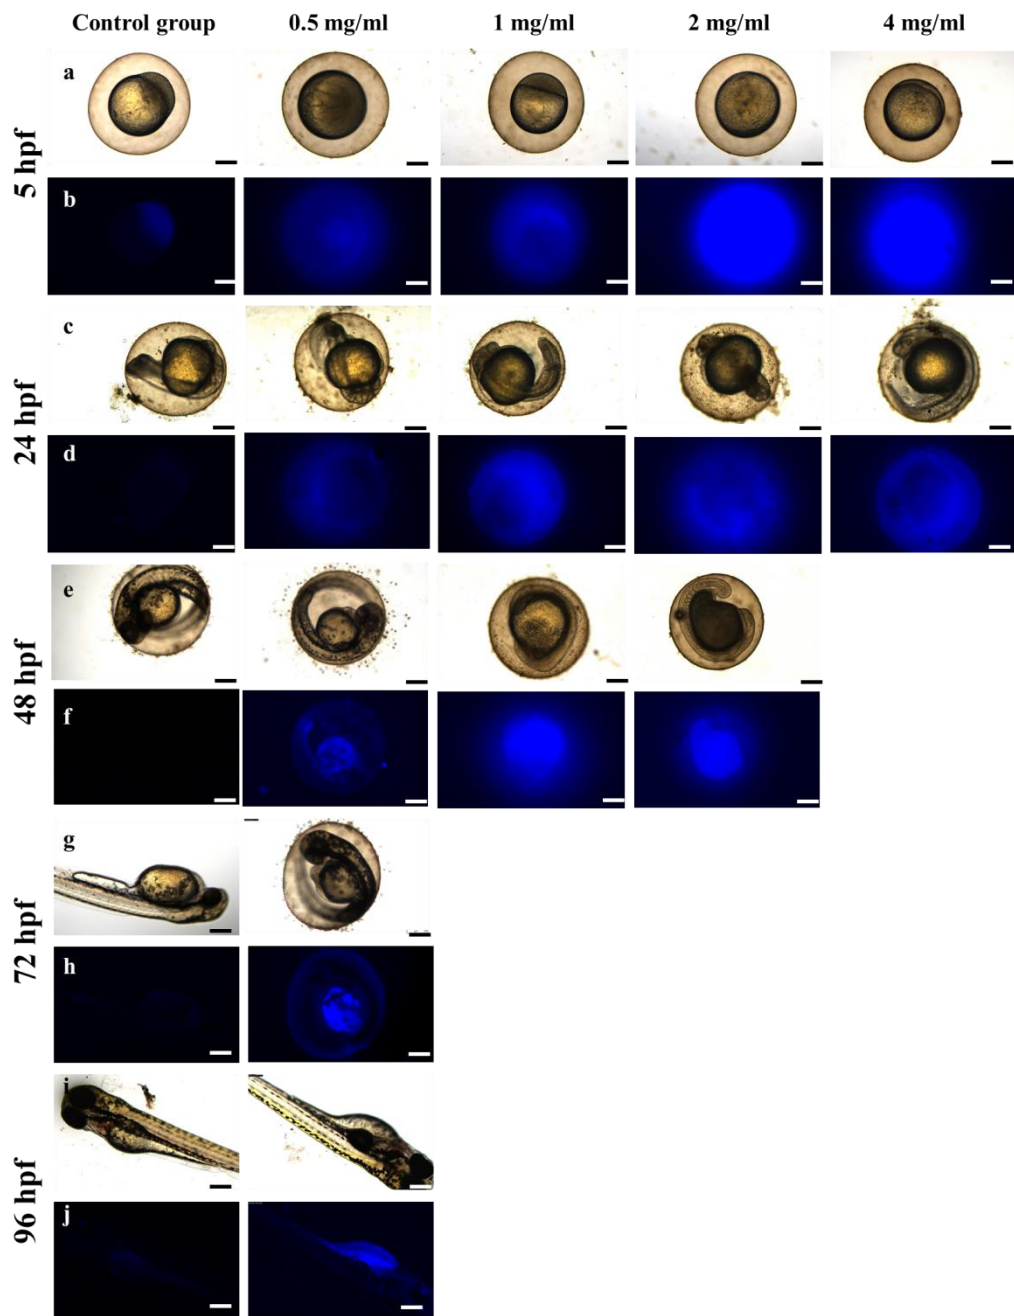

**Figure S2.** The fluorescent imaging of zebrafish eggs in different concentrations of CDs solution (0, 0.5, 1, 2, and 4 mg/mL). (a,c,e,g,i) Bright field; (b,d,f,h,j) fluorescent field (ultraviolet). Scale bars, 250  $\mu$ m.

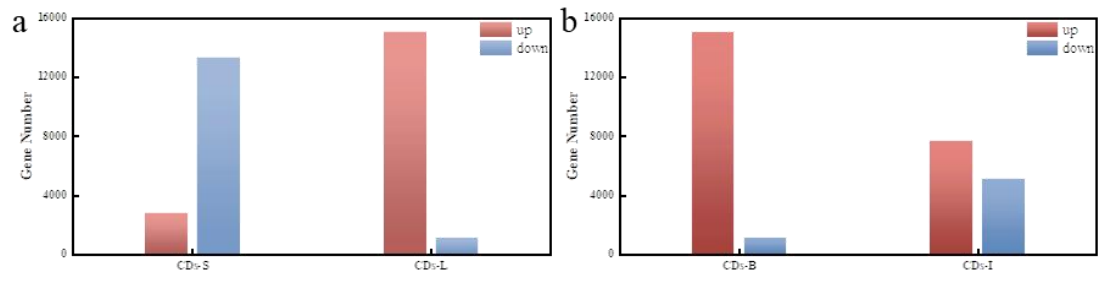

**Figure S3.** Differential gene up-regulation and down-regulation.

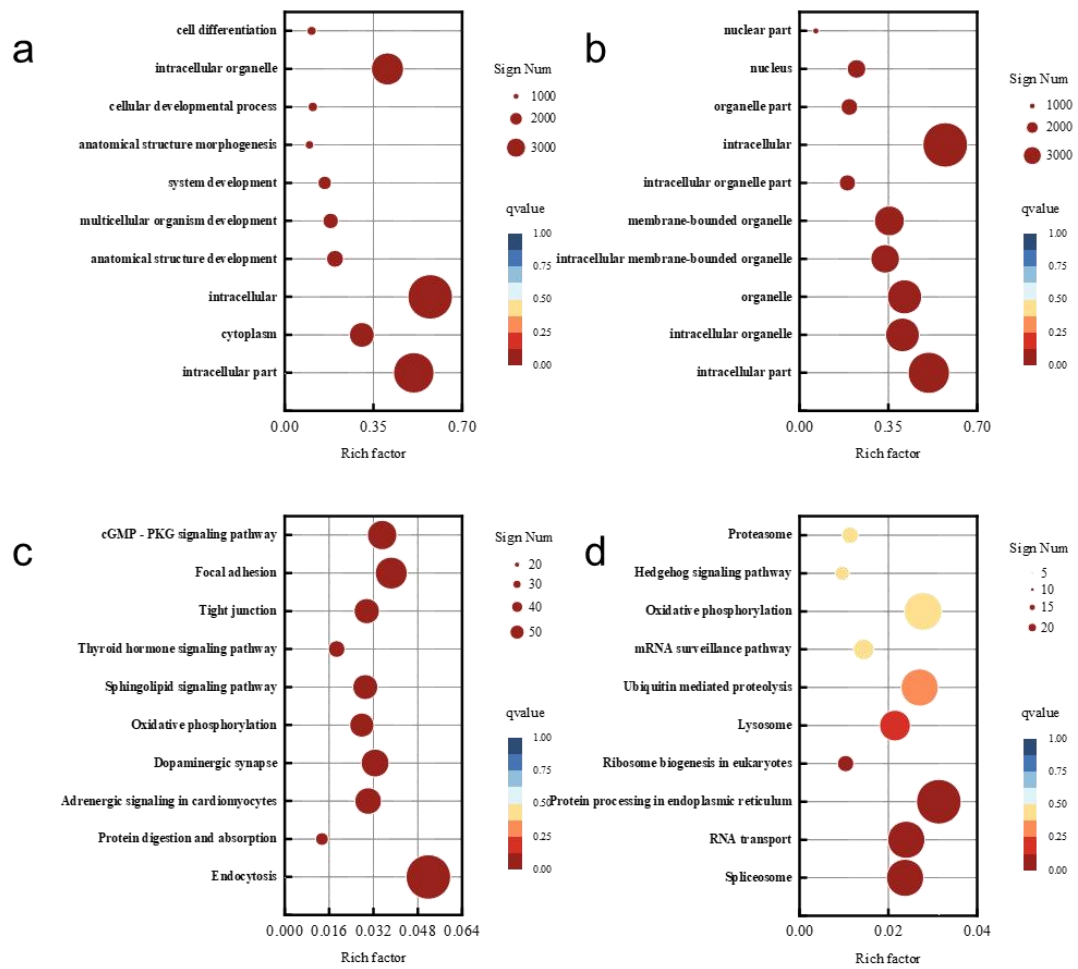

**Figure S4.** GO enrichment plot of CD-S (a) and CD-L (b); KEGG enrichment plot of CD-S (c) and CD-L (d).

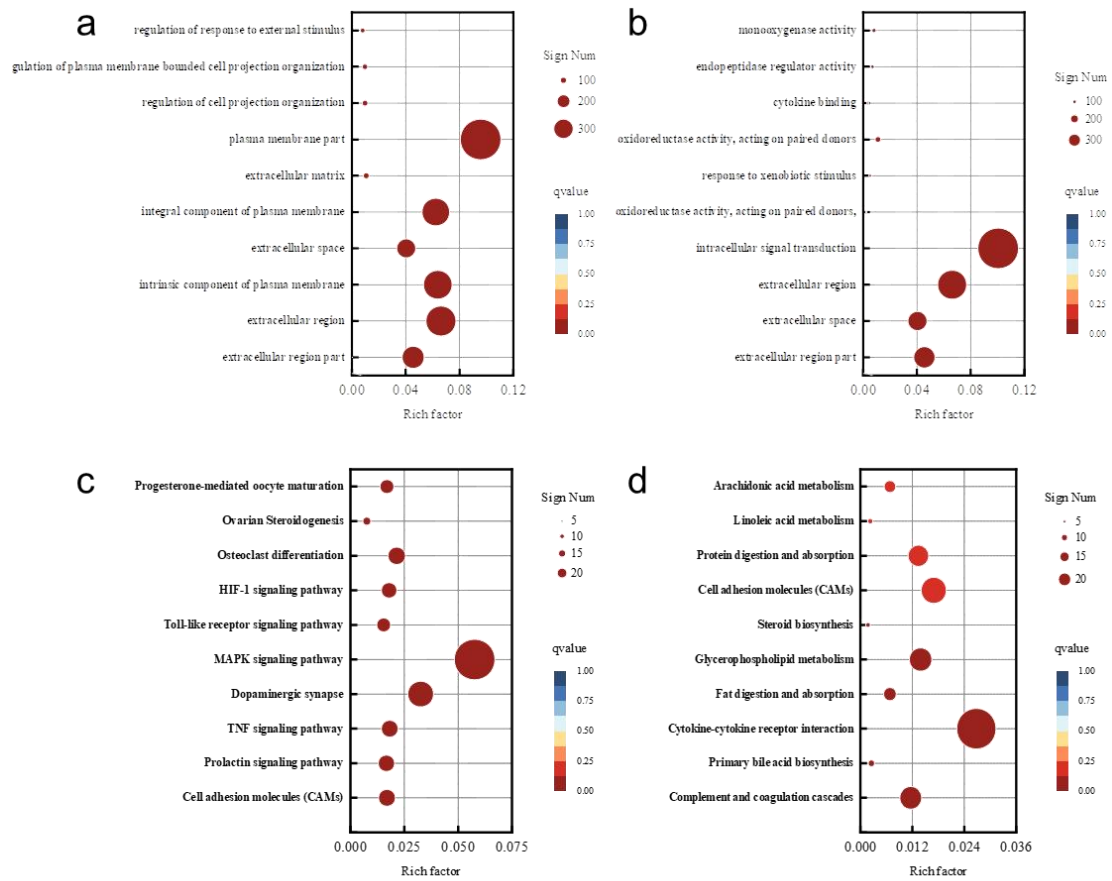

**Figure S5.** GO enrichment plot of CD-B (a) and CD-I (b); KEGG enrichment plot of CD-B (c) and CD-I (d).



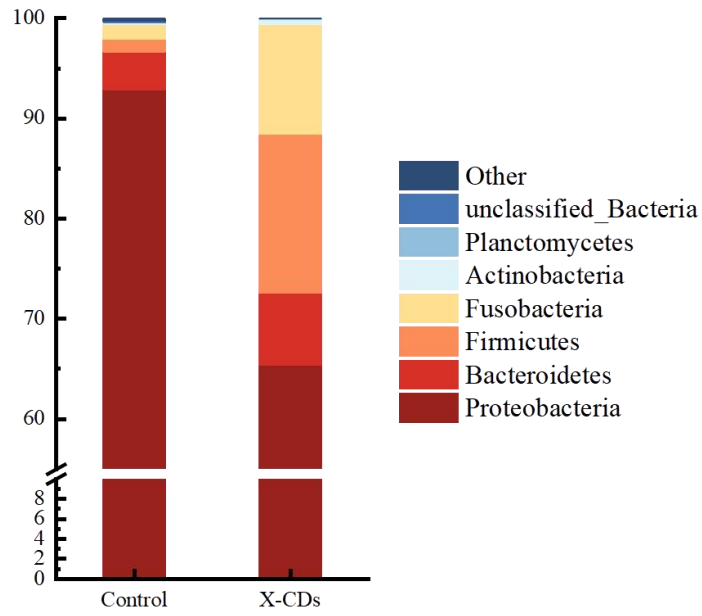

**Figure S6.** Intestinal flora abundance map of zebrafish
